# Supplementary material
Source: PubMed Central journal article supplement (PMC7136031)
Supplement: NIHMS1521214-supplement-Supplemental_Data_File___doc___tif__pdf__etc__.pdf [file NIHMS1521214-supplement-Supplemental_Data_File___doc___tif__pdf__etc__.pdf]

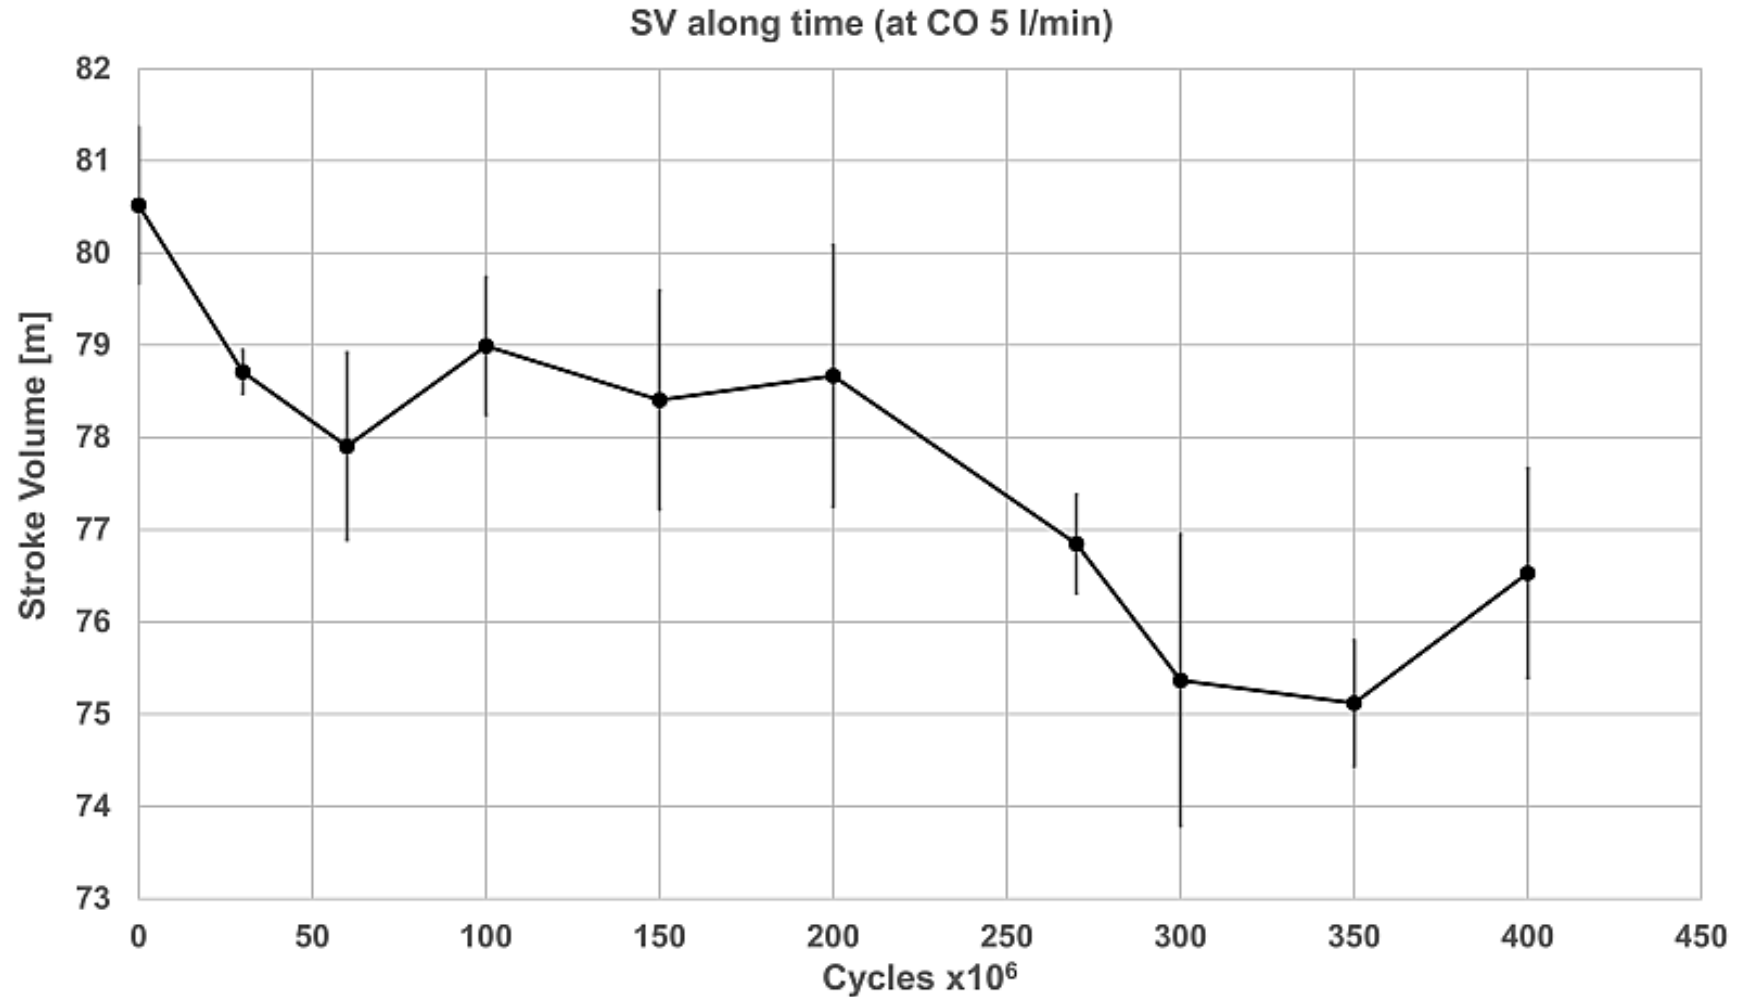

**Supplementary Figure 1.** Hydrodynamic performance of the polymeric valves along the AWT – complementary to Figure 4, showing the SV measured in the hydrodynamic testing along time in the AWT for constant CO of 5 L/min. AWT – Accelerated Wear Testing; CO – Cardiac Output; SV – Stroke Volume.
